# Supplementary material for: Cardiomyocyte BRAF and type 1 RAF inhibitors promote cardiomyocyte and cardiac hypertrophy in mice in vivo
Source: PubMed Central journal article supplement (PMC8883496; doi:10.1042/bcj20210615), 2022-02-11
Supplement: BCJ-479-401-s1.pdf [file BCJ-479-401-s1.pdf]

## **Cardiomyocyte BRAF and and type 1 RAF inhibitors promote cardiac hypertrophy: Supplementary Tables.**

Clerk A<sup>1\*</sup>, Meijles DN<sup>2</sup>, Hardyman MA<sup>1</sup>, Fuller SJ<sup>1</sup>, Chothani SP<sup>3</sup>, Cull JJ<sup>1</sup>, Cooper STE<sup>2</sup>, Alharbi HO<sup>1</sup>, Vanezis K<sup>4,6,7</sup>, Felkin LE<sup>4,5</sup>, Markou T<sup>1</sup>, Leonard SJ<sup>1</sup>, Shaw SW<sup>1</sup>, Rackham OJL<sup>3</sup>, Cook, SA<sup>3,6,8</sup>, Glennon PE<sup>9</sup>, Sheppard MN<sup>10</sup>, Sembrat JC<sup>11</sup>, Rojas M<sup>11</sup>, McTiernan CF<sup>12</sup>, Barton PJ<sup>4,5</sup>, and Sugden PH<sup>1</sup>

<sup>1</sup>School of Biological Sciences, University of Reading, Reading, UK. <sup>2</sup>Molecular and Clinical Sciences Institute, St. George's University of London, London, UK. <sup>3</sup>Program in Cardiovascular and Metabolic Disorders, Duke-National University of Singapore Medical School, Singapore. <sup>4</sup>National Heart and Lung Institute, Imperial College London, London, UK. <sup>5</sup>Cardiovascular Research Centre, Royal Brompton and Harefield Hospitals, London UK. <sup>6</sup>MRC London Institute of Medical Sciences, Imperial College London, London UK. <sup>7</sup>Current address MiNA Therapeutics Ltd, London UK. <sup>8</sup>National Heart Centre Singapore, Singapore City, Singapore. <sup>9</sup>University Hospitals Coventry and Warwickshire, University Hospital Cardiology Department, Clifford Bridge Road, Coventry, UK. <sup>10</sup>CRY Cardiovascular Pathology Department, St. George's Healthcare NHS Trust, London, UK. <sup>11</sup>Division of Pulmonary, Allergy and Critical Care Medicine, and Dorothy P & Richard P Simmons Center for Interstitial Lung Disease, Department of Medicine, University of Pittsburgh, Pittsburgh, USA. <sup>12</sup>Heart, Lung, Blood Vascular Medicine Institute, University of Pittsburgh, USA.

**Supplementary Table S1. Human samples.**

**Supplementary Table S2. Mouse body weights.**

**Supplementary Table S3. Primers for genotyping and confirmation of recombination.**

**Supplementary Table S4. qPCR primer sequences**

**Supplementary Table S5. Antibodies used for immunoblotting and immunostaining.**

**Supplementary Table S6. Tamoxifen treatment does not increase cardiac gene expression**

**Supplementary Table S7. Echocardiography data: effects of BRaf<sup>V600E</sup> knock-in *in vivo*.**

**Supplementary Table S8. Echocardiography data: tamoxifen alone has no significant effect on cardiac dimensions/function in mice *in vivo*.**

**Supplementary Table S9. VevoStrain analysis for cardiac function from BRAF<sup>V600E</sup> knock-in, SB590885 or encorafenib.**

**Supplementary Table S10. Echocardiography data: effects of SB590885 and encorafenib *in vivo*.**

**Supplementary Table S11. VevoStrain analysis: effects of SB590885 on the response to angiotensin II (AngII) of mouse hearts *in vivo*.**

**Supplementary Table S1. Human samples.** \* Not included in mRNA analysis due to insufficient sample. LVEF, Left ventricular ejection fraction. LVEDD, Left ventricular end diastolic diameter.

| Study ID | Age | Sex | LVEF (%) | LVEDD (cm) | Additional information           |
|----------|-----|-----|----------|------------|----------------------------------|
| C1*      | 59  | M   | -        | -          | -                                |
| C2       | 37  | M   | -        | -          | -                                |
| C3*      | 28  | M   | -        | -          | -                                |
| C4       | 43  | M   | -        | -          | -                                |
| C5*      | 65  | M   | -        | -          | -                                |
| C6       | 65  | M   | -        | -          | -                                |
| C7       | 56  | F   | -        | -          | -                                |
| C8       | 39  | F   | -        | -          | -                                |
| C9       | 49  | F   | -        | -          | -                                |
| C10      | 68  | F   | -        | -          | -                                |
| C11      | 36  | F   | -        | -          | -                                |
| C12*     | 47  | F   | -        | -          | -                                |
| D1       | 26  | M   | 10-15    | 5.5        | Non-ischaemic/muscular dystrophy |
| D2       | 66  | F   | 15       | 5.8        | Non-ischaemic                    |
| D3       | 66  | M   | 10-15    | 9.4        | Non-ischaemic                    |
| D4       | 67  | M   | 20       | 5.9        | Dilated cardiomyopathy           |
| D5       | 56  | M   | 10       | 8.3        | Dilated cardiomyopathy           |
| D6       | 50  | M   | 60-65    | 5.2        | Hypertrophic                     |
| D7       | 64  | F   | 15-20    | 7.1        | Non-ischaemic/mixed              |
| D8       | 67  | M   | 10-15    | 6.7        | Non-ischaemic                    |
| D9       | 54  | M   | 20-25    | 6.4        | Non-ischaemic                    |
| D10      | 57  | M   | 19       | 6.4        | Non-ischaemic                    |
| D11      | 55  | M   | 20-25    | 6.0        | Non-ischaemic                    |
| D12      | 46  | F   | 65-70    | 4.7        | Hypertrophic                     |

**Supplementary Table S2. Mouse body weights.** Body weights (BW) are in g. Weights were taken post-minipump insertion (Start) and when mice were culled (End); weights included the minipumps. p values relative to starting weight (2-way ANOVA with Holm-Sidak's post-test).

| Study                                      | Condition        | Start |        | End   |        | n | p value start vs end |
|--------------------------------------------|------------------|-------|--------|-------|--------|---|----------------------|
|                                            |                  | Mean  | SEM    | Mean  | SEM    |   |                      |
| <b>CreHet</b>                              | Vehicle          | 25.06 | 0.58   | 25.54 | 0.54   | 5 | 0.1149               |
|                                            | Tamoxifen        | 25.01 | 0.4    | 26.19 | 0.48   | 7 | 0.0011               |
| <b>BRaf<sup>V600E/Cre</sup> (10 d)</b>     | Vehicle          | 23.28 | 0.58   | 24.62 | 0.59   | 8 | <0.0001              |
|                                            | Tamoxifen        | 23.37 | 0.39   | 24.52 | 0.47   | 9 | <0.0001              |
| <b>BRaf<sup>V600E/Cre</sup> (6 wks)</b>    | Vehicle          | 24.13 | 1.05   | 27.23 | 1.05   | 4 | 0.0002               |
|                                            | Tamoxifen        | 24.12 | 0.67   | 27.42 | 0.71   | 6 | <0.0001              |
| <b>SB590885</b>                            | Vehicle          | 26.07 | 0.83   | 27.62 | 0.71   | 6 | <0.0001              |
|                                            | SB590885         | 25.83 | 0.38   | 26.43 | 0.38   | 6 | 0.0003               |
| <b>Encorafenib</b>                         | Vehicle          | 24.89 | 0.42   | 25.36 | 0.53   | 8 | 0.0289               |
|                                            | Encorafenib      | 25.39 | 0.38   | 26.43 | 0.38   | 7 | 0.0005               |
| <b>SB590885 and angiotensin II (AngII)</b> | Vehicle          | 24.39 | 2.322  | 27.84 | 0.7507 | 8 | 0.092                |
|                                            | AngII            | 26.39 | 0.6323 | 25.92 | 0.6238 | 9 | 0.9347               |
|                                            | SB590885 + AngII | 26.34 | 0.815  | 26.3  | 0.6153 | 7 | 0.9789               |

**Supplementary Table S3. Primers for genotyping and confirmation of recombination.**

| Mouse strain           | DNA  | Forward primer                     | Reverse primer                      | Annealing temp. |
|------------------------|------|------------------------------------|-------------------------------------|-----------------|
| <b>Genotyping</b>      |      |                                    |                                     |                 |
| BRaf <sup>fV600E</sup> | gDNA | TGAGTATTTTTGTGGCAACTGC             | CTCTGCTGGGAAAGCGGC                  | 54°C            |
| Cre <sup>-</sup>       | gDNA | TCTATTGCACACAGCAATCCA              | CCAACTCTTGTGAGAGGAGCA               | 52°C            |
| Cre <sup>MCM</sup>     | gDNA | TCTATTGCACACAGCAATCCA              | CCAGCATTGTGAGAACAAGG                | 52°C            |
| <b>Recombination</b>   |      |                                    |                                     |                 |
| BRaf <sup>fV600E</sup> | cDNA | GCTCGGCAGACTGCACAGGGC<br>ATGGATTAC | TGAGGCACTCTGCCATTAATCT<br>CTTCATGGC | 64°C            |

**Supplementary Table S4. qPCR primer sequences**

| Gene Symbol        | Accession No. | Sense Primer (5'→3')        | Antisense Primer (5'→3')  |
|--------------------|---------------|-----------------------------|---------------------------|
| <b>Mouse genes</b> |               |                             |                           |
| ARAF               | NM_009703.2   | AGCATCCAGGATCTGTCTGG        | ACCTGCATGAGGCTGGAGTC      |
| BRAF               | NM_139294.5   | GGCCAGGCTCTGTTC AATG        | CTCTTTGCTGAAGGGCATCT      |
| RAF1               | NM029780.4    | AGTTAGAGCCGAGCGGACTT        | ACTCCAAAGCCATTGCTGAT      |
| Col1a1             | NM_007742     | TCGTGGCTTCTCTGGTCTC         | CCGTTGAGTCCGCTTTTGC       |
| Ddr2               | NM_022563.2   | GCACTTGGTGAATTAATTAGAATCCTG | GGACAACATAATGGTCCCTCCC    |
| Dusp5              | NM_00108539   | GAGTGCTGTGTGGATGTGAA        | CTGGTCATAGGCTGGTCTGT      |
| Egr1               | NM_007913     | GCCTTCGCTCACTCCACTA         | GCTGGGATTGGTAGGTGGTA      |
| Fos                | NM_010234     | CTTCACCCTGCCCTTCTC          | CGGAAACAAGAAGTCATCAAAGG   |
| Fn1                | NM_010233     | AAGAGGACGTTGCAGAGCTA        | AGACACTGGAGACACTGACTAA    |
| Gapdh              | NM_008084.2   | TCACCACCATGGAGAAGGC         | GCTAAGCAGTTGGTGGTGCA      |
| IL11               | NM_00129042   | TGACGGAGATCACAGTCTGGA       | CGGAGGTAGGACATCAAGTCTAC   |
| IL1b               | NM_008361     | CAACCAACAAGTGATATTCTCCAT    | GGGTGTGCCGCTTTTCATTA      |
| IL6                | NM_031168     | TCCATCCAGTTGCCTTCTTG        | GGTCTGTTGGGAGTGGTATC      |
| Jun                | NM_010591     | CCTAACATTCGATCTCATTAGTATTA  | CTACAGAAGCAATCTACAGTCTCTA |
| Myh6               | NM_00116417   | CGAGCTGGATGAGCGGAG          | TCTGCTGGAGAGGTTATTCCTCG   |
| Myh7               | NM_080728     | CATGCCAACCGTATGGCTG         | GTTCCACGATGGCGATGTTT      |
| Myc                | NM_00117735   | AACAACCGCAAGTGCTCCA         | GTTCTCCTCTGACGTTCCAA      |
| Nppa               | NM_008725     | GATGGATTTCAAGAACCTGCTAGA    | CTTCTCAGTCTGCTCACTCA      |
| Nppb               | NM_008726     | TCCAGCAGAGACCTCAAATTC       | CAGTGCGTTACAGCCAAA        |
| Postn              | NM_015784     | TTCTCTCTGCCCTTATATGC        | CCTGATCCCAGCCCTGAT        |
| <b>Human genes</b> |               |                             |                           |
| ARAF               | NM_001654.4   | ATGTTTCGTCTCTGCCCTGAT       | GATGGAGGAGCTCCCAAAT       |
| BRAF               | NM_004333.5   | CATTCCGGAGGAGTGTG           | AGTTCCGTTCCCGAGAGATT      |
| RAF1               | NM_001354689  | GGAGACACATGGGATTTTGG        | GCTGTGAAAGGAGGACGCTGT     |
| GAPDH              | Primer Design | Proprietary sequence        | Proprietary sequence      |
| <b>Rat genes</b>   |               |                             |                           |
| Ctgf               | NM_022266     | CTATGATGCGAGCCAAGTGC        | GAGACGACTCTGCTTCTCCAG     |
| Dusp2              | NM_00101208   | ACTTGCGGAAATTAATTGAAGTCTAAA | ACATGGTTTCTGCTTGTACAG     |
| Dusp5              | NM_133578     | CCTTGGACTTTGGCATGGTTT       | GGGTCTGACAACCTTCTGAATGA   |
| Dusp6              | NM_053883     | AGCGACTGGAATGAGAACACA       | GCAGCCCTCGTCTTTGAGT       |
| Egr1               | NM_012551     | TCAGTCGTAGTGACCACCTTAC      | GGTATGCCTCTTGCCTTTCATC    |
| Fos                | NM_022197     | GGGACAGCTTTCTACTACC         | GGCACTAGAGACGGACAGATC     |
| Fos1               | NM_012953     | GTCCAGCAGCAGAAGTTCCA        | GGGACTGTACTGGGGATAGGT     |
| Gapdh              | NM_017008.3   | CCAAGGTCATCCATGACAACCTT     | AGGGGCCATCCACAGTCTT       |
| Nppb               | NM_031545.1   | CCAGGAGAGACTTCGAAATTCCA     | TGCAGCCAGGAGGTCTTCC       |
| Myc                | NM_012603     | CGTTATTTGAAGCCTGAATTTCT     | TCATAGTTCCTGTTAGCGAAGC    |

**Supplementary Table S5. Antibodies used for immunoblotting and immunostaining.** CST, Cell Signaling Technologies; SCBT, Santa Cruz Biotechnology Inc.; BD, BD Transduction Labs.

| Protein                                   | Source              | Cat. No.  | Host   | Dilution |
|-------------------------------------------|---------------------|-----------|--------|----------|
| Phospho-MKK1/2(S217/221)                  | CST                 | 9154      | Rabbit | 1/1000   |
| Total MKK1/2                              | CST                 | 8727      | Rabbit | 1/1000   |
| Phospho-ERK1/2(T202/Y204)                 | CST                 | 4377      | Rabbit | 1/1000   |
| Total ERK1/2                              | CST                 | 4695      | Rabbit | 1/1000   |
| Total RAF1                                | BD                  | 610152    | Mouse  | 1/1000   |
| Total BRAF                                | SCBT                | sc-5284   | Mouse  | 1/1000   |
| Total ARAF                                | SCBT                | sc-408    | Rabbit | 1/500    |
| Phospho-p90RSK(Ser573)                    | CST                 | 9346      | Rabbit | 1/1000   |
| Phospho-p90RSK(Ser380)                    | CST                 | 9341      | Rabbit | 1/1000   |
| Total p90RSK (RSK1/RSK2/RSK3)             | CST                 | 9347      | Rabbit | 1/1000   |
| Phospho-p70S6K(Ser371)                    | CST                 | 9208      | Rabbit | 1/1000   |
| Phospho-p70S6K(Ser389)                    | CST                 | 9205      | Rabbit | 1/1000   |
| Total p70S6K                              | CST                 | 9202      | Rabbit | 1/1000   |
| Phospho-Akt(Thr308)                       | CST                 | 9275      | Rabbit | 1/1000   |
| Phospho-Akt(Ser473)                       | CST                 | 9271      | Rabbit | 1/1000   |
| Total Akt                                 | CST                 | 9272      | Rabbit | 1/1000   |
| GAPDH                                     | CST                 | 5174      | Rabbit | 1/1000   |
| Troponin T                                | Stratech Scientific | MS-295-P1 | Mouse  | 1/40     |
| Anti-Mouse immunoglobulins/AlexaFluor 488 | Invitrogen          | A-11001   | Goat   | 1/200    |
| Anti-Mouse immunoglobulins/HRP            | Dako                | P0260     | Rabbit | 1/5000   |
| Anti-Rabbit immunoglobulins/HRP           | Dako                | P0448     | Goat   | 1/5000   |

**Supplementary Table S6. Tamoxifen treatment does not have a substantial effect on cardiac gene expression.** Mice heterozygous for floxed BRAF<sup>V600E</sup> and hemizygous for Myh6-directed tamoxifen-inducible Cre (BRAF<sup>V600E/WT</sup>/Cre<sup>MCM/-</sup>) or hemizygous for Cre alone (Cre<sup>MCM/-</sup>) were treated with 40 mg/kg (i.p.) tamoxifen (Tam) or vehicle (Veh) for 10 d. RNA was prepared from mouse hearts and mRNA expression assessed by qPCR. Results are normalised to the mean of samples from vehicle-treated mice. \* p<0.05, \*\*p<0.01, \*\*\*p<0.005 relative to vehicle-treated controls (two-tailed unpaired t test).

| Gene symbol | Cre <sup>MCM/-</sup> |      |                 |      | BRAF <sup>V600E/WT</sup> /Cre <sup>MCM/-</sup> |      |                 |      |
|-------------|----------------------|------|-----------------|------|------------------------------------------------|------|-----------------|------|
|             | Vehicle (n=7)        |      | Tamoxifen (n=9) |      | Vehicle (n=5)                                  |      | Tamoxifen (n=4) |      |
|             | Mean                 | SEM  | Mean            | SEM  | Mean                                           | SEM  | Mean            | SEM  |
| Myh7        | 1.00                 | 0.12 | 1.99*           | 0.36 | 1.00                                           | 0.05 | 6.84***         | 1.20 |
| Nppa        | 1.00                 | 0.17 | 0.94            | 0.17 | 1.00                                           | 0.07 | 2.33*           | 0.57 |
| Nppb        | 1.00                 | 0.10 | 1.09            | 0.06 | 1.00                                           | 0.15 | 2.74**          | 0.51 |
| Egr1        | 1.00                 | 0.18 | 0.74            | 0.14 | 1.00                                           | 0.09 | 1.56**          | 0.10 |
| Fos         | 1.00                 | 0.21 | 0.70            | 0.16 | 1.00                                           | 0.12 | 1.89*           | 0.35 |
| Myc         | 1.00                 | 0.10 | 1.08            | 0.08 | 1.00                                           | 0.07 | 1.50*           | 0.14 |
| IL11        | 1.00                 | 0.12 | 1.08            | 0.16 | 1.00                                           | 0.18 | 2.62*           | 0.68 |
| Col1a1      | 1.00                 | 0.06 | 1.10            | 0.06 | 1.00                                           | 0.07 | 1.98***         | 0.15 |
| Lox         | 1.00                 | 0.05 | 1.14            | 0.08 | 1.00                                           | 0.05 | 1.70**          | 0.19 |
| IL1β        | 1.00                 | 0.15 | 0.91            | 0.07 | 1.00                                           | 0.10 | 1.55*           | 0.14 |

**Supplementary Table S7. Echocardiography data: effects of BRaf<sup>V600E</sup> knock-in *in vivo*.**

Mice heterozygous for floxed BRaf<sup>V600E</sup> and hemizygous for Myh6-directed tamoxifen-inducible Cre (BRaf<sup>V600E/WT</sup>/Cre<sup>MCM/-</sup>) were treated with 40 mg/kg (i.p.) tamoxifen or vehicle for 10 d or 6 weeks. Cardiac function and dimensions were measured by echocardiography. Echocardiograms were taken at baseline and 10 d or 6 weeks. M-mode images from short axis views were taken at the level of the papillary muscles. Data were analysed using VevoLab software. LV, left ventricular; AW, anterior wall; ID, internal diameter; PW, posterior wall; d, diastole; s, systole. \* p<0.05, \*\*p<0.01, \*\*\*p<0.005 relative to vehicle-treated controls (two-tailed unpaired t test).

| Acute effects of BRaf <sup>V600E</sup> knock-in (10 d)      |               |       |                 |       |               |       |                 |       |
|-------------------------------------------------------------|---------------|-------|-----------------|-------|---------------|-------|-----------------|-------|
|                                                             | Baseline      |       |                 |       | 10 d          |       |                 |       |
|                                                             | Vehicle (n=9) |       | Tamoxifen (n=9) |       | Vehicle (n=9) |       | Tamoxifen (n=9) |       |
|                                                             | Mean          | SEM   | Mean            | SEM   | Mean          | SEM   | Mean            | SEM   |
| Heart Rate (bpm)                                            | 485           | 12    | 481             | 6     | 525           | 11    | 483*            | 12    |
| Stroke volume (µl)                                          | 35.4          | 2.0   | 38.8            | 2.3   | 33.7          | 2.4   | 39.9            | 3.6   |
| Ejection Fraction (%)                                       | 50.1          | 1.8   | 51.5            | 2.0   | 47.3          | 1.9   | 56.3            | 2.9   |
| Fractional Shortening (%)                                   | 25.3          | 1.2   | 26.4            | 1.3   | 23.5          | 1.1   | 29.4            | 2.0   |
| Cardiac output (ml/min)                                     | 17.2          | 1.2   | 18.5            | 0.9   | 17.8          | 1.5   | 19.2            | 1.8   |
| LVAW;d (mm)                                                 | 0.752         | 0.018 | 0.821           | 0.020 | 0.795         | 0.016 | 0.866*          | 0.028 |
| LVAW;s (mm)                                                 | 1.073         | 0.022 | 1.136           | 0.021 | 1.084         | 0.018 | 1.236***        | 0.031 |
| LVID;d (mm)                                                 | 4.004         | 0.064 | 4.101           | 0.075 | 3.984         | 0.070 | 3.943           | 0.080 |
| LVID;s (mm)                                                 | 3.002         | 0.063 | 3.035           | 0.076 | 3.059         | 0.059 | 2.798*          | 0.088 |
| LVPW;d (mm)                                                 | 0.684         | 0.019 | 0.685           | 0.013 | 0.711         | 0.016 | 0.804*          | 0.035 |
| LVPW;s (mm)                                                 | 0.999         | 0.033 | 1.009           | 0.016 | 0.980         | 0.018 | 1.194***        | 0.046 |
| Chronic effects of BRaf <sup>V600E</sup> knock-in (6 weeks) |               |       |                 |       |               |       |                 |       |
|                                                             | Baseline      |       |                 |       | 6 weeks       |       |                 |       |
|                                                             | Vehicle (n=4) |       | Tamoxifen (n=6) |       | Vehicle (n=4) |       | Tamoxifen (n=6) |       |
|                                                             | Mean          | SEM   | Mean            | SEM   | Mean          | SEM   | Mean            | SEM   |
| Heart Rate (bpm)                                            | 510           | 19    | 509             | 10    | 473           | 19    | 507             | 20    |
| Stroke volume (µl)                                          | 42.0          | 1.4   | 41.8            | 2.2   | 47.9          | 2.6   | 45.2            | 2.9   |
| Ejection Fraction (%)                                       | 53.2          | 1.1   | 55.1            | 1.4   | 59.4          | 2.7   | 74.6            | 4.3   |
| Fractional Shortening (%)                                   | 27.1          | 0.7   | 28.4            | 0.9   | 31.4          | 1.9   | 43.8            | 3.8   |
| Cardiac output (ml/min)                                     | 21.4          | 1.3   | 21.3            | 1.3   | 22.6          | 1.4   | 23.0            | 2.0   |
| LVAW;d (mm)                                                 | 0.877         | 0.025 | 0.800           | 0.036 | 0.839         | 0.046 | 0.968           | 0.048 |
| LVAW;s (mm)                                                 | 1.236         | 0.030 | 1.133           | 0.040 | 1.287         | 0.088 | 1.435           | 0.085 |
| LVID;d (mm)                                                 | 4.172         | 0.063 | 4.099           | 0.063 | 4.223         | 0.044 | 3.729**         | 0.083 |
| LVID;s (mm)                                                 | 3.052         | 0.074 | 2.940           | 0.046 | 2.904         | 0.076 | 2.135**         | 0.163 |
| LVPW;d (mm)                                                 | 0.738         | 0.017 | 0.722           | 0.019 | 0.772         | 0.046 | 0.834           | 0.034 |
| LVPW;s (mm)                                                 | 1.025         | 0.028 | 1.049           | 0.030 | 1.114         | 0.062 | 1.349           | 0.074 |

**Supplementary Table S8. Echocardiography data: tamoxifen alone has no significant effect on cardiac dimensions/function in mice *in vivo*.** Mice hemizygous for Myh6-directed tamoxifen-inducible Cre (Cre<sup>MCM/-</sup>) were treated with 40 mg/kg (i.p.) tamoxifen or vehicle for 10 d. Cardiac function and dimensions were measured by echocardiography. Echocardiograms were taken at baseline and 10 d. M-mode images from short axis views were taken at the level of the papillary muscles. Data were analysed using VevoLab software. LV, left ventricular; AW, anterior wall; ID, internal diameter; PW, posterior wall; d, diastole; s, systole.

|                           | Baseline      |       |                 |       | 10 d          |       |                 |       |
|---------------------------|---------------|-------|-----------------|-------|---------------|-------|-----------------|-------|
|                           | Vehicle (n=5) |       | Tamoxifen (n=7) |       | Vehicle (n=5) |       | Tamoxifen (n=7) |       |
|                           | Mean          | SEM   | Mean            | SEM   | Mean          | SEM   | Mean            | SEM   |
| Heart Rate (bpm)          | 495           | 9     | 486             | 14    | 518           | 22    | 528             | 24    |
| Stroke volume (μl)        | 35.8          | 2.2   | 41.6            | 2.5   | 36.6          | 0.6   | 39.3            | 3.2   |
| Ejection Fraction (%)     | 49.0          | 0.8   | 52.1            | 0.9   | 51.2          | 3.0   | 51.5            | 2.5   |
| Fractional Shortening (%) | 24.5          | 0.5   | 26.6            | 0.5   | 25.9          | 1.8   | 26.3            | 1.6   |
| Cardiac output (ml/min)   | 17.7          | 1.1   | 20.2            | 1.3   | 19.0          | 0.9   | 20.9            | 2.6   |
| LVAW;d (mm)               | 0.748         | 0.018 | 0.767           | 0.016 | 0.795         | 0.040 | 0.856           | 0.037 |
| LVAW;s (mm)               | 1.071         | 0.015 | 1.107           | 0.021 | 1.160         | 0.039 | 1.212           | 0.043 |
| LVID;d (mm)               | 4.055         | 0.090 | 4.178           | 0.129 | 4.022         | 0.119 | 4.103           | 0.061 |
| LVID;s (mm)               | 3.045         | 0.081 | 3.105           | 0.112 | 2.981         | 0.156 | 3.039           | 0.034 |
| LVPW;d (mm)               | 0.640         | 0.017 | 0.672           | 0.014 | 0.703         | 0.036 | 0.723           | 0.009 |
| LVPW;s (mm)               | 0.964         | 0.018 | 0.993           | 0.013 | 1.027         | 0.033 | 1.060           | 0.021 |

**Supplementary Table S9. VevoStrain analysis for cardiac function in mice with BRAF<sup>V600E</sup> knock-in, SB590885 or encorafenib.** Mice heterozygous for floxed BRAF<sup>V600E</sup> and hemizygous for Myh6-directed tamoxifen-inducible Cre (BRAf<sup>V600E/WT</sup>/Cre<sup>MCM/-</sup>) were treated with 40 mg/kg (i.p.) tamoxifen or vehicle (6 wks). Echocardiograms were taken at baseline and 6 weeks. Alternatively, C57BL/6J male mice were treated with vehicle, 0.5 mg/kg/d SB590885 or 3 mg/kg/d encorafenib (7 d). Echocardiograms were taken at 3 and 7 d. B-mode images of long-axis views of the heart were analysed using VevoStrain software. EDV, end diastolic volume; ESV, end systolic volume; GLS, global longitudinal strain; EDLVM, end diastolic left ventricular mass; ESLVM, end systolic left ventricular mass. \* p<0.05, \*\*p<0.01 relative to vehicle-treated controls (two-tailed unpaired t test).

| Chronic effects of BRAF <sup>V600E</sup> knock-in (6 weeks) |                      |      |                 |      |                       |      |        |      |
|-------------------------------------------------------------|----------------------|------|-----------------|------|-----------------------|------|--------|------|
|                                                             | Vehicle (n=4)        |      | Tamoxifen (n=6) |      |                       |      |        |      |
|                                                             | Mean                 | SEM  | Mean            | SEM  |                       |      |        |      |
| EDV                                                         | 45.18                | 4.56 | 29.82*          | 2.93 |                       |      |        |      |
| ESV                                                         | 15.85                | 2.42 | 7.18**          | 0.86 |                       |      |        |      |
| Stroke volume (µl)                                          | 29.34                | 2.63 | 22.64           | 2.24 |                       |      |        |      |
| Fractional shortening (%)                                   | 32.93                | 2.25 | 46.21*          | 3.54 |                       |      |        |      |
| Cardiac output (ml/min)                                     | 13.43                | 1.66 | 10.90           | 0.99 |                       |      |        |      |
| GLS                                                         | -23.47               | 3.02 | -25.10          | 2.72 |                       |      |        |      |
| Ejection fraction (%)                                       | 64.93                | 2.61 | 75.62**         | 1.50 |                       |      |        |      |
| EDLVM (mg)                                                  | 53.50                | 3.41 | 61.43*          | 1.33 |                       |      |        |      |
| ESLVM (mg)                                                  | 55.10                | 3.51 | 63.80           | 2.09 |                       |      |        |      |
| Heart Rate (bpm)                                            | 454                  | 20   | 486             | 21   |                       |      |        |      |
| Effects of SB590885 and encorafenib                         |                      |      |                 |      |                       |      |        |      |
|                                                             | 0.5 mg/kg/d SB590885 |      |                 |      | 3 mg/kg/d encorafenib |      |        |      |
|                                                             | Vehicle (n=6)        |      | SB590885 (n=6)  |      | Vehicle (n=6)         |      |        |      |
|                                                             | Mean                 | SEM  | Mean            | SEM  | Mean                  | SEM  | Mean   | SEM  |
| <b>3 d</b>                                                  |                      |      |                 |      |                       |      |        |      |
| EDV                                                         | 46.28                | 4.41 | 45.50           | 2.62 | 47.11                 | 4.71 | 45.00  | 3.05 |
| ESV                                                         | 20.68                | 2.20 | 18.36           | 1.47 | 21.41                 | 2.10 | 20.85  | 2.28 |
| Stroke volume (µl)                                          | 25.59                | 2.71 | 27.14           | 1.97 | 25.71                 | 3.10 | 24.15  | 0.99 |
| Fractional shortening (%)                                   | 27.02                | 1.33 | 32.57**         | 0.78 | 27.32                 | 1.92 | 25.59  | 2.26 |
| Cardiac output (ml/min)                                     | 12.41                | 1.31 | 13.93           | 1.31 | 12.14                 | 1.68 | 12.30  | 0.45 |
| GLS                                                         | -19.06               | 1.73 | -22.29          | 2.70 | -18.54                | 1.21 | -20.71 | 1.62 |
| Ejection fraction (%)                                       | 55.11                | 2.59 | 59.27           | 2.61 | 54.07                 | 2.60 | 54.30  | 2.12 |
| EDLVM (mg)                                                  | 54.96                | 2.59 | 65.53*          | 3.21 | 51.56                 | 1.76 | 60.92* | 3.16 |
| ESLVM (mg)                                                  | 57.89                | 2.51 | 69.38*          | 4.01 | 55.63                 | 2.52 | 65.55  | 3.75 |
| Heart Rate (bpm)                                            | 486                  | 17   | 513             | 23   | 467                   | 16   | 512    | 16   |
| <b>7 d</b>                                                  |                      |      |                 |      |                       |      |        |      |
| EDV                                                         | 46.00                | 5.47 | 45.16           | 2.79 | 42.49                 | 2.32 | 40.57  | 2.61 |
| ESV                                                         | 17.41                | 2.25 | 15.81           | 1.16 | 17.62                 | 1.54 | 16.14  | 2.27 |
| Stroke volume (µl)                                          | 28.59                | 3.51 | 29.35           | 1.78 | 24.87                 | 1.43 | 24.44  | 0.97 |
| Fractional shortening (%)                                   | 34.93                | 1.53 | 34.71           | 1.88 | 32.11                 | 1.97 | 33.02  | 2.94 |
| Cardiac output (ml/min)                                     | 13.35                | 1.66 | 15.45           | 1.58 | 12.23                 | 0.97 | 12.68  | 0.72 |
| GLS                                                         | -21.32               | 1.05 | -24.31          | 1.07 | -18.84                | 1.28 | -22.31 | 2.34 |
| Ejection fraction (%)                                       | 61.76                | 2.08 | 64.62           | 1.13 | 58.36                 | 2.01 | 61.34  | 3.44 |
| EDLVM (mg)                                                  | 52.86                | 2.93 | 62.42           | 3.35 | 50.28                 | 2.03 | 57.67* | 1.12 |
| ESLVM (mg)                                                  | 54.65                | 2.95 | 67.70*          | 4.08 | 53.14                 | 2.28 | 61.11* | 1.42 |
| Heart Rate (bpm)                                            | 470                  | 19   | 522             | 27   | 490                   | 20   | 517    | 14   |

**Supplementary Table S10. Echocardiography data: effects of SB590885 and encorafenib *in vivo*.** C57BL/6J male mice were treated with vehicle, 0.5 mg/kg/d SB590885 or 3 mg/kg/d encorafenib for 7 d. Cardiac function and dimensions were measured by echocardiography. Echocardiograms were taken at baseline, 3 d and 7 d. M-mode images from short axis views were taken at the level of the papillary muscles. Data were analysed using VevoLab software. LV, left ventricular; AW, anterior wall; ID, internal diameter; PW, posterior wall; d, diastole; s, systole.

| Baseline                  | 0.5 mg/kg/d SB590885 |            |                |            | 3 mg/kg/d encorafenib |            |                   |            |
|---------------------------|----------------------|------------|----------------|------------|-----------------------|------------|-------------------|------------|
|                           | Vehicle (n=6)        |            | SB590885 (n=6) |            | Vehicle (n=8)         |            | Encorafenib (n=8) |            |
|                           | Mean                 | SEM        | Mean           | SEM        | Mean                  | SEM        | Mean              | SEM        |
| Heart Rate (bpm)          | 482                  | 11         | 449            | 9          | 493                   | 8          | 484               | 5          |
| Stroke volume (µl)        | 43.6                 | 4.4        | 45.6           | 3.5        | 40.1                  | 2.1        | 36.5              | 1.2        |
| Ejection Fraction (%)     | 58.8                 | 2.2        | 56.2           | 1.7        | 52.5                  | 2.1        | 48.0              | 1.3        |
| Fractional Shortening (%) | 30.9                 | 1.5        | 29.2           | 1.2        | 26.8                  | 1.3        | 24.0              | 0.8        |
| Cardiac output (ml/min)   | 20.9                 | 2.1        | 20.5           | 1.8        | 19.8                  | 1.1        | 17.6              | 0.7        |
| LVAW;d (mm)               | 0.805                | 0.023      | 0.795          | 0.027      | 0.764                 | 0.011      | 0.769             | 0.015      |
| LVAW;s (mm)               | 1.126                | 0.043      | 1.135          | 0.027      | 1.081                 | 0.020      | 1.059             | 0.015      |
| LVID;d (mm)               | 4.052                | 0.138      | 4.216          | 0.108      | 4.139                 | 0.115      | 4.112             | 0.056      |
| LVID;s (mm)               | 2.801                | 0.096      | 3.002          | 0.089      | 3.041                 | 0.123      | 3.128             | 0.063      |
| LVPW;d (mm)               | 0.666                | 0.016      | 0.659          | 0.020      | 0.713                 | 0.014      | 0.703             | 0.010      |
| LVPW;s (mm)               | 0.991                | 0.031      | 0.961          | 0.022      | 0.996                 | 0.014      | 0.936             | 0.018      |
|                           |                      |            |                |            |                       |            |                   |            |
| <b>3 d</b>                | <b>Mean</b>          | <b>SEM</b> | <b>Mean</b>    | <b>SEM</b> | <b>Mean</b>           | <b>SEM</b> | <b>Mean</b>       | <b>SEM</b> |
| Heart Rate (bpm)          | 512                  | 15         | 540            | 22         | 499                   | 17         | 526               | 13         |
| Stroke volume (µl)        | 45.1                 | 3.8        | 44.3           | 1.5        | 40.8                  | 2.5        | 40.1              | 2.0        |
| Ejection Fraction (%)     | 58.6                 | 1.2        | 62.2           | 1.9        | 55.0                  | 2.3        | 55.1              | 3.2        |
| Fractional Shortening (%) | 30.7                 | 0.9        | 33.2           | 1.4        | 28.4                  | 1.5        | 28.6              | 2.1        |
| Cardiac output (ml/min)   | 23.0                 | 2.0        | 24.0           | 1.5        | 20.3                  | 1.4        | 21.1              | 1.1        |
| LVAW;d (mm)               | 0.817                | 0.044      | 0.894          | 0.040      | 0.749                 | 0.020      | 0.831             | 0.019      |
| LVAW;s (mm)               | 1.181                | 0.045      | 1.312          | 0.058      | 1.078                 | 0.029      | 1.121             | 0.023      |
| LVID;d (mm)               | 4.112                | 0.120      | 4.004          | 0.057      | 4.084                 | 0.131      | 4.046             | 0.075      |
| LVID;s (mm)               | 2.878                | 0.042      | 2.649*         | 0.080      | 2.927                 | 0.133      | 2.906             | 0.117      |
| LVPW;d (mm)               | 0.699                | 0.014      | 0.793          | 0.046      | 0.706                 | 0.033      | 0.759             | 0.013      |
| LVPW;s (mm)               | 1.025                | 0.034      | 1.175*         | 0.052      | 1.029                 | 0.026      | 1.089             | 0.030      |
|                           |                      |            |                |            |                       |            |                   |            |
| <b>7 d</b>                | <b>Mean</b>          | <b>SEM</b> | <b>Mean</b>    | <b>SEM</b> | <b>Mean</b>           | <b>SEM</b> | <b>Mean</b>       | <b>SEM</b> |
| Heart Rate (bpm)          | 507                  | 21         | 537            | 27         | 512                   | 20         | 517               | 17         |
| Stroke volume (µl)        | 42.5                 | 3.8        | 41.3           | 2.6        | 41.4                  | 2.1        | 40.8              | 1.7        |
| Ejection Fraction (%)     | 60.0                 | 2.3        | 58.4           | 3.0        | 55.9                  | 1.6        | 55.6              | 1.9        |
| Fractional Shortening (%) | 31.7                 | 1.6        | 30.7           | 2.0        | 28.9                  | 1.0        | 28.8              | 1.3        |
| Cardiac output (ml/min)   | 21.6                 | 2.2        | 22.5           | 2.6        | 21.3                  | 1.6        | 21.1              | 1.2        |
| LVAW;d (mm)               | 0.764                | 0.017      | 0.834          | 0.023      | 0.791                 | 0.029      | 0.826             | 0.024      |
| LVAW;s (mm)               | 1.028                | 0.023      | 1.080          | 0.037      | 1.092                 | 0.025      | 1.116             | 0.007      |
| LVID;d (mm)               | 4.008                | 0.141      | 4.016          | 0.091      | 4.069                 | 0.085      | 4.062             | 0.059      |
| LVID;s (mm)               | 2.741                | 0.118      | 2.788          | 0.116      | 2.903                 | 0.086      | 2.899             | 0.072      |
| LVPW;d (mm)               | 0.673                | 0.021      | 0.757          | 0.041      | 0.737                 | 0.028      | 0.765             | 0.021      |
| LVPW;s (mm)               | 1.019                | 0.024      | 1.063          | 0.056      | 1.055                 | 0.027      | 1.094             | 0.028      |



**Supplementary Table S11. VevoStrain analysis: effects of SB590885 on the response to angiotensin II (AngII) of mouse hearts *in vivo*.** C57BL/6J male mice were treated with vehicle, 0.8 mg/kg/d AngII or AngII in the presence of 0.5 mg/kg/d SB590885 for 7 d. Cardiac function and dimensions were measured by echocardiography. Echocardiograms were taken at 7 d. B-mode images of long-axis views of the heart were analysed using VevoStrain software. EDV, end diastolic volume; ESV, end systolic volume; GLS, global longitudinal strain; EDLVM, end diastolic left ventricular mass; ESLVM, end systolic left ventricular mass. \* p<0.05, \*\*p<0.01, \*\*\*p<0.001 relative to vehicle-treated controls (one-way ANOVA with Holm-Sidak's post-test).

|                           | Vehicle (n=8) |      | AngII (n=9) |      | SB590885 + AngII (n=7) |      |
|---------------------------|---------------|------|-------------|------|------------------------|------|
|                           | Mean          | SEM  | Mean        | SEM  | Mean                   | SEM  |
| EDV                       | 53.93         | 2.34 | 37.56***    | 2.56 | 45.63                  | 2.43 |
| ESV                       | 26.77         | 1.73 | 17.73**     | 1.80 | 22.89                  | 2.15 |
| Stroke volume (µl)        | 27.14         | 1.89 | 19.82**     | 1.14 | 22.74                  | 0.96 |
| Fractional shortening (%) | 26.13         | 1.99 | 27.37       | 2.12 | 26.07                  | 1.96 |
| Cardiac output (ml/min)   | 13.41         | 1.06 | 9.88**      | 0.50 | 11.62                  | 0.43 |
| GLS                       | -17.60        | 1.68 | -18.04      | 0.68 | -15.75                 | 1.47 |
| Ejection fraction (%)     | 50.12         | 2.51 | 53.22       | 2.28 | 49.85                  | 2.52 |
| EDLVM (mg)                | 58.00         | 1.59 | 66.59       | 3.60 | 62.57                  | 1.45 |
| ESLVM (mg)                | 61.48         | 1.00 | 68.34       | 3.85 | 64.66                  | 1.77 |
| Heart Rate (bpm)          | 492           | 13   | 501         | 9    | 512                    | 8    |
